# Supplementary material for: ATM Loss Confers Greater Sensitivity to ATR Inhibition Than PARP Inhibition in Prostate Cancer
Source: Oxford University Press journal article supplement (doi:10.1158/0008-5472.can-19-3126), 2020-03-03
Supplement: 00085472can193126-sup-230240_2_supp_6120416_q6b7ls.xlsx [file 00085472can193126-sup-230240_2_supp_6120416_q6b7ls.xlsx]

## Sheet: siRNA sequences
Supplementary Table 1: siRNA and sgRNA sequences
siRNA sequences
Gene	siRNA name	siRNA Sequence	Catalog No.	Company	Final Concentraiton
ATM	Hs_ATM_3	Target sequence 5'-AAGGTCTATGATATGCTTAAA-3' Sense strand 5'-GGUCUAUGAUAUGCUUAAATT-3' Antisense strand 5'UUUAAGCAUAUCAUAGACCTT-3'	S1000000840	Qiagen	20 nM
ATM	Hs_ATM_8	Target sequence 5'-AACCATGAGTCTACTACTTAA-3' Sense strand 5'-CCAUGAGUCUAGUACUUAATT-3' Antisense strand 5'-UUAAGUACUAGACUCAUGGTT-3'	S100604730	Qiagen	20 nM
ATM	Hs_ATM_9	Target sequence 5'-TTGGCTTATACGCGCAGTGTA-3'	S100604737	Qiagen	20 nM
BRCA1/2	si-BRCA	Target sequence 5'-AATATTAAACCTGCATTCTTC-3' Sense strand 5'-UAUUAAACCUGCAUUCUUCTT-3' Antisense strand 5'-GAAGAAUGCAGGUUUAAUATT-3'	1027423	Qiagen	20 nM
AllStars Neg	Control siRNA	NA	1027280	Qiagen	20 nM
sgRNA sequences
Gene	sgRNA name	sgRNA Sequence
ATM	ATM-1	Sense strand: CACCGGTAAGATTGAGAAATCTCCA Antisense Strand: AAACTGGAGATTTCTCAATCTTACC
ATM	ATM-2	Sense strand: CACCGTTAGGGCAGCTGATATTGG Antisense Strand: AAACCCGAATATCAGCTGCCCTAAC
